# Supplementary material
Source: PubMed Central journal article supplement (PMC3956594)
Supplement: NIHMS537577-supplement-01.pdf [file NIHMS537577-supplement-01.pdf]

## Supplementary Materials for

### **Cigarette Smoke Induction of Osteopontin (SPP1) Mediates T<sub>H</sub>17 Inflammation in Human and Experimental Emphysema**

Ming Shan, Xiaoyi Yuan, Li-zhen Song, Luz Roberts, Nazanin Zarinkamar,  
Alexander Seryshev, Yiqun Zhang, Susan Hilsenbeck, Seon-Hee Chang, Chen Dong,  
David B. Corry,\* Farrah Kheradmand\*

\*To whom correspondence should be addressed. E-mail: farrahk@bcm.edu (F.K.); dcorry@bcm.edu  
(D.B.C.)

Published 18 January 2012, *Sci. Transl. Med.* **4**, 117ra9 (2012)  
DOI: 10.1126/scitranslmed.3003041

#### **The PDF file includes:**

- Fig. S1. Active cigarette smoke exposure assembly.
- Fig. S2. Increased macrophage, dendritic cell, and neutrophil in response to cigarette smoke.
- Fig. S3. Increased lung volume and decreased density in response to cigarette smoke.
- Fig. S4. Cytokine profile in BALF of air- or smoke-exposed mice.
- Fig. S5. Morphology of alveolar macrophage in response to smoke.
- Fig. S6. *Mmp9* expression in BALF of smoke-exposed mice.
- Fig. S7. Inflammatory cytokine production after lung APC adoptive transfer.
- Fig. S8. Short-term cigarette smoke exposure activates APC and IL-17A production.
- Fig. S9. Enhanced SPP1 expression in human lung macrophage.
- Fig. S10. SPP1 siRNA inhibits IL-17A and IFN- $\gamma$  cytokine production.
- Table S1. Demographics of study participants.

**Fig. S1**

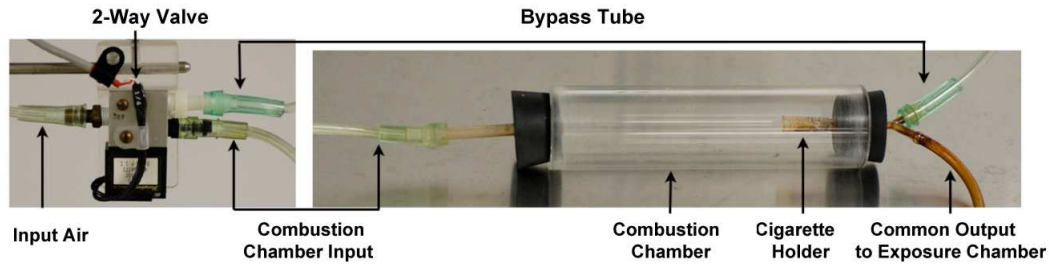

**Fig. S1. Active cigarette smoke exposure assembly**

Mice are exposed to the actively generated smoke of 4 cigarettes delivered over one hour, once per day, 5 days/week, for 4-6 months. Air (4L/min flow rate) feeds into a timer controlled 2-way valve that directs the flow of gas to a glass combustion chamber containing a lit cigarette (not shown) or to a bypass tube. Both paths feed into a common output leading to an exposure chamber capable of housing up to 10 mice. Smoke in the exposure chamber is directed through an exhaust port to the atmosphere.

**Fig. S2**

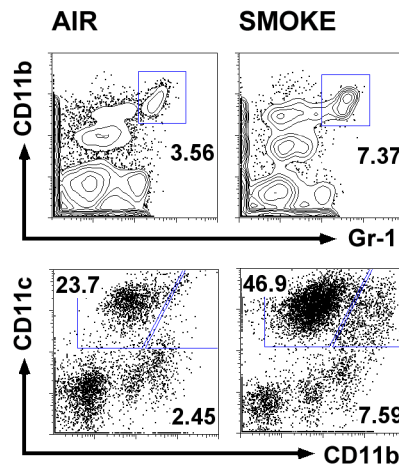

**Fig. S2. Increased macrophage, dendritic cell, and neutrophil in response to cigarette smoke.**

Total lung single cell suspensions were stained with Pacific Blue-B220, APC-CD11c, PE-CD11b, and APC-Cy7-Gr1 antibodies and analyzed by flow cytometry. Upper panel shows the percentage of CD11b<sup>high</sup>Gr1<sup>+</sup> neutrophils gated from B220<sup>-</sup>CD11c<sup>-</sup> population. Lower panel shows the percentage of CD11c<sup>+</sup>CD11b<sup>low</sup> alveolar macrophages and CD11c<sup>+</sup>CD11b<sup>+</sup> lung dendritic cells from B220<sup>-</sup> population. Data represent 3 different experiments with five mice each experiment.

**Fig. S3**

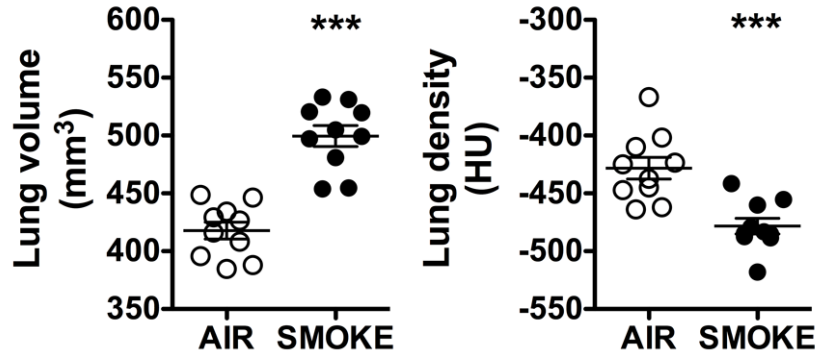

**Fig. S3. Increased lung volume and decreased density in response to cigarette smoke.**

Mouse micro-CT scan was obtained at Baylor College of Medicine mice phenotyping core facility using 35-micron resolution (n=10 in each group) protocol. Lung volume and average density were calculated using Amira 3.1.1 software. Data shown are mean±s.e.m. \*\*\*P<0.001, determined by student t test.

**Fig. S4**

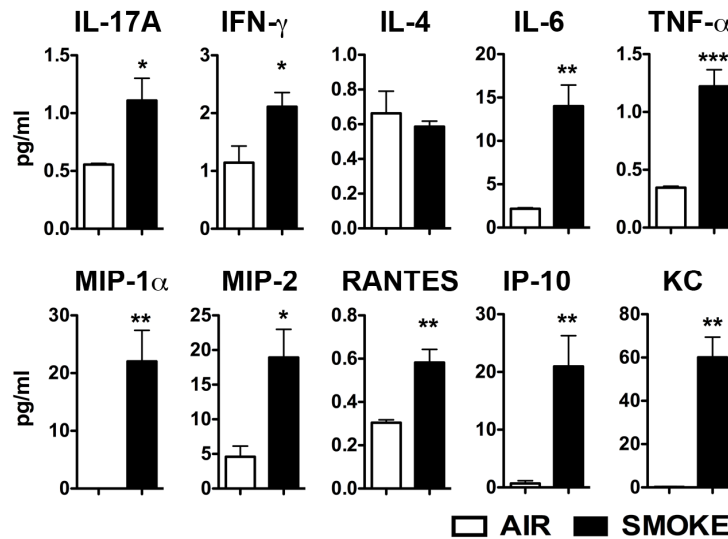

**Fig. S4. Cytokine profile in BALF of air- or smoke-exposed mice.**

Cytokine concentration of BAL fluid from 4-month air or cigarette smoke exposed mice were measured using Milliplex kit for (n=5 in each group). Data shown are mean±s.e.m.. \*P<0.05, \*\*P<0.01, \*\*\*P<0.001, determined by student t test.

**Fig. S5**

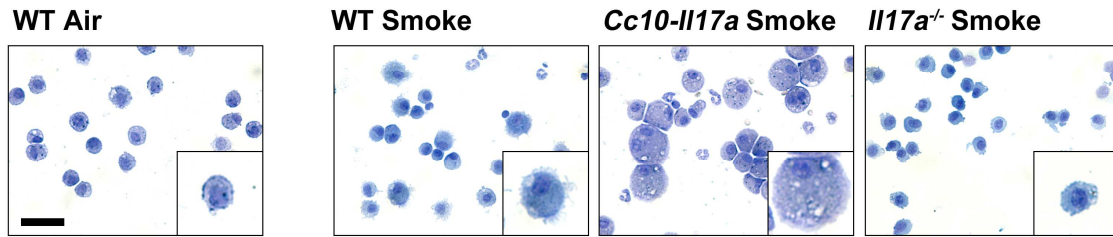

**Fig. S5. Morphology of alveolar macrophage in response to smoke.**

Representative HEMA3 stain of BALF cells that were collected following 4 months of air or smoke exposure in wild type (WT), IL-17A-overexpressing (*Cc10-Il17a*) mice, and IL-17A deficient (*Il17a<sup>-/-</sup>*) mice. Data represents at least two different experiments with 4-8 mice each experiment. Scale bar: 50 $\mu$ m.

**Fig. S6**

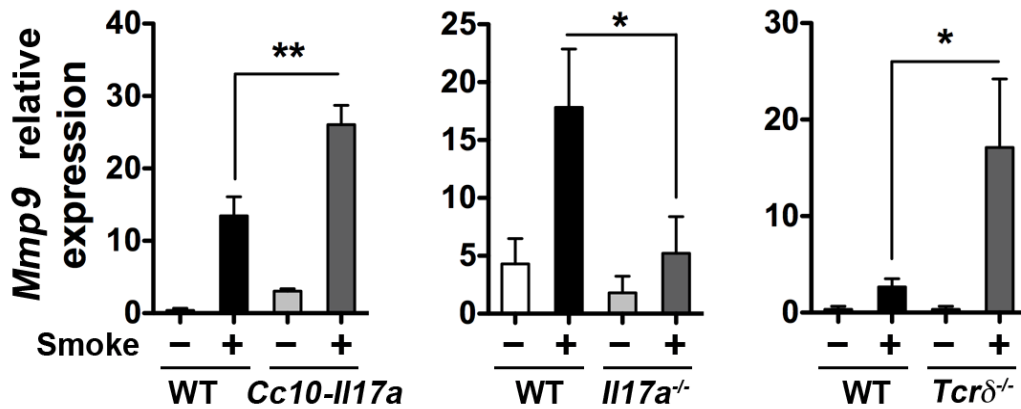

**Fig. S6. *Mmp9* expression in BALF of smoke-exposed mice.**

*Mmp9* mRNA expression from total BALF cells of air and smoke exposed mice (n = 4-8 / group; data normalized to 18S expression). Data shown are mean $\pm$ s.e.m.

\*\*P<0.01, \*P<0.05, determined by one-way ANOVA test.

**Fig. S7**

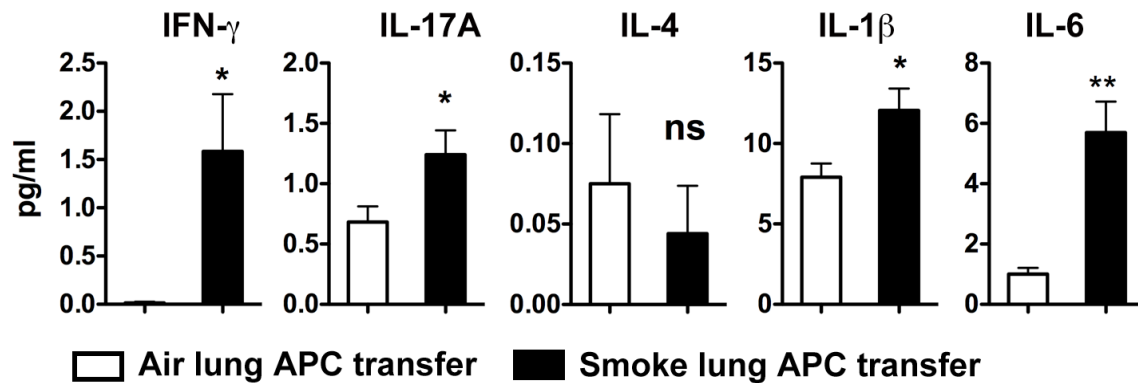

**Fig. S7. Inflammatory cytokine production after lung APC adoptive transfer.** Cytokine concentration in BALF of WT recipient mice following adoptive transfer of air or smoke exposed lung APCs; cytokines were measured by Milliplex kit. (n = 4~5 / group). Data shown are mean $\pm$ s.e.m. \*P<0.05, \*\*P<0.01, ns, no significance, determined by student t test.

**Fig. S8**

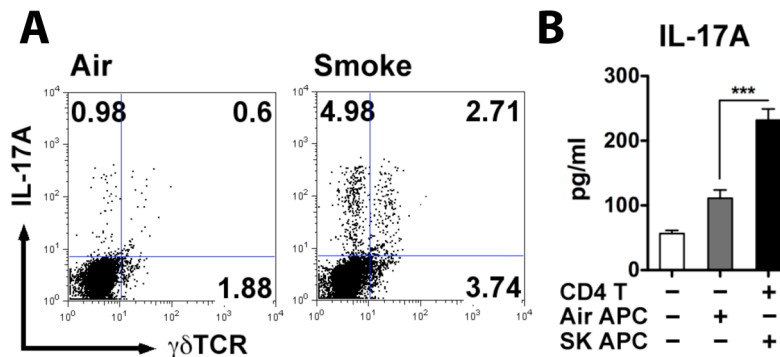

**Fig. S8. Short-term cigarette smoke exposure activates APC and IL-17A production.** (A) Representative IL-17A intracellular staining of T cells isolated from lungs of mice exposed to 6-8 weeks of cigarette smoke. Data are representative of 2 independent studies, n=4 / group / study. (B) Splenic CD4 T cells were cultured for 3 days with mouse lung APCs isolated from air- or smoke-exposed animals in the presence of soluble anti-CD3 antibody (1 $\mu$ g/ml). IL-17A was quantified from culture supernatants. (n = 4, data represent two independent experiments). SK, smoke. Data shown are mean $\pm$ s.e.m. \*\*\*P<0.001, determined by one-way ANOVA test.

**Fig. S9**

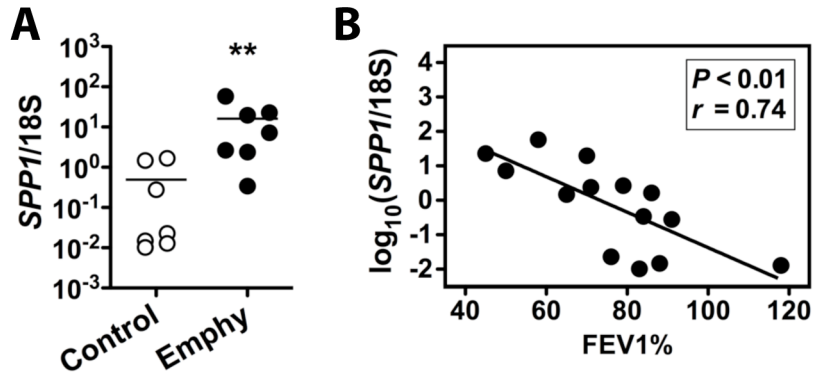

**Fig. S9. Enhanced SPP1 expression in human lung macrophage.**

(A) SPP1 mRNA expression in control (n=7) and emphysema lung macrophages (n=7) as determined by quantitative PCR (normalized to 18S expression). \*\*P<0.01, determined by Mann-Whitney test. (B) Correlation of lung macrophages SPP1 mRNA expression as shown in (A) and emphysema disease severity (FEV1%) (control n=7; emphysema n=7). Statistics are derived by linear regression.

**Fig. S10**

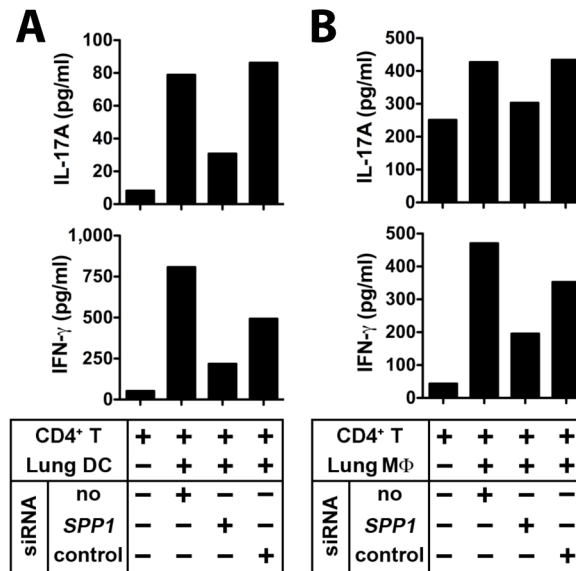

**Fig. S10. SPP1 siRNA inhibits IL-17A and IFN-γ cytokine production.**

(A) Emphysema lung DCs or (B) macrophages were transfected with 10ng of SPP1 or scramble control siRNA. After 24 hrs, lung DCs and macrophages were cultured with allogenic human PBMC CD4 T cells plus 1μg/ml anti-CD3 for 3 days. The concentration of IFN-γ and IL-17 present in the cell culture supernatant was measured by Milliplex. Data are representative of three independent experiments.

**Table S1**

| <b>Characteristics</b>           | <b>Controls</b> | <b>Emphysema</b> |
|----------------------------------|-----------------|------------------|
| No.                              | 13              | 13               |
| Age (mean $\pm$ SEM)             | 63 $\pm$ 4      | 66 $\pm$ 2       |
| Male (No.)                       | 11              | 11               |
| <b>Lung Function</b>             |                 |                  |
| %FEV1 (mean $\pm$ SEM)           | 92 $\pm$ 5      | 66 $\pm$ 4       |
| <b>GOLD stages</b>               | 0               | I-III            |
| <b>Smoking Status, No.</b>       |                 |                  |
| Never                            | 1               | -                |
| Former                           | 6               | 7                |
| Current                          | 6               | 6                |
| PPY, (mean $\pm$ SEM)            | 32 $\pm$ 6      | 65 $\pm$ 7       |
| Quitting years, (mean $\pm$ SEM) | 13 $\pm$ 6      | 5 $\pm$ 3        |

**Table S1. Demographics of study participants.**

No., number; SEM, Standard Error; %FEV1, Forced Expiratory Volume in 1 second % predicted; GOLD, Global initiative Obstructive Lung Disease; PPY, pack-year of smoking where one pack/day/year equals 1 PPY; Quitting years, the number of years since smoke cessation.
